# Supplementary material
Source: Springer Nature journal article supplement (https://www.springermedizin.de/resource/supplementary/12885_2010_2289_MOESM7_ESM.pdf/9460948)

**A**

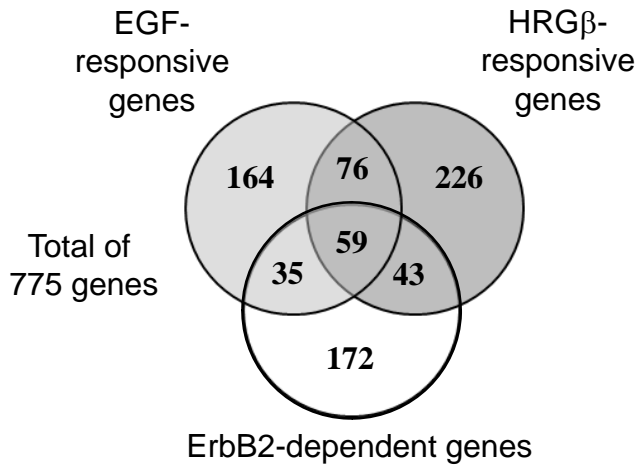

**B**

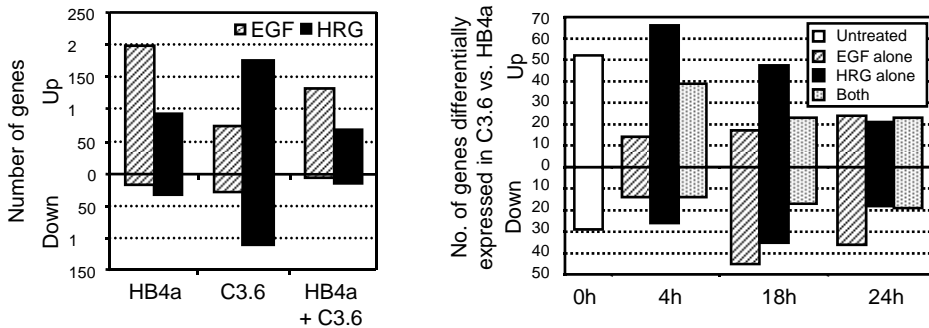

**C**

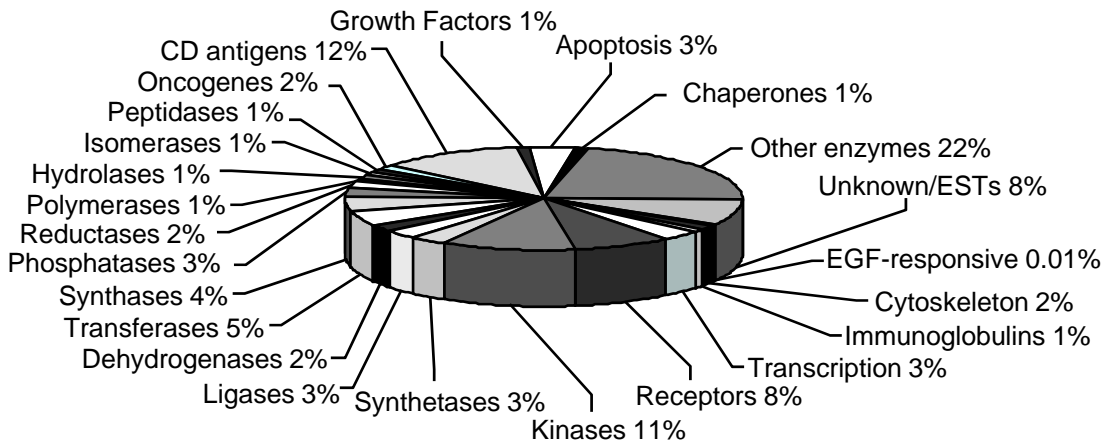

Supplement: MOESM7 [file 9460948]
